# Supplementary material for: Toxic response of graphene nanoplatelets in vivo and in vitro
Source: Springer Nature journal article supplement (doi:10.1007/s00204-014-1303-x), 2014-06-30

Supple 1.

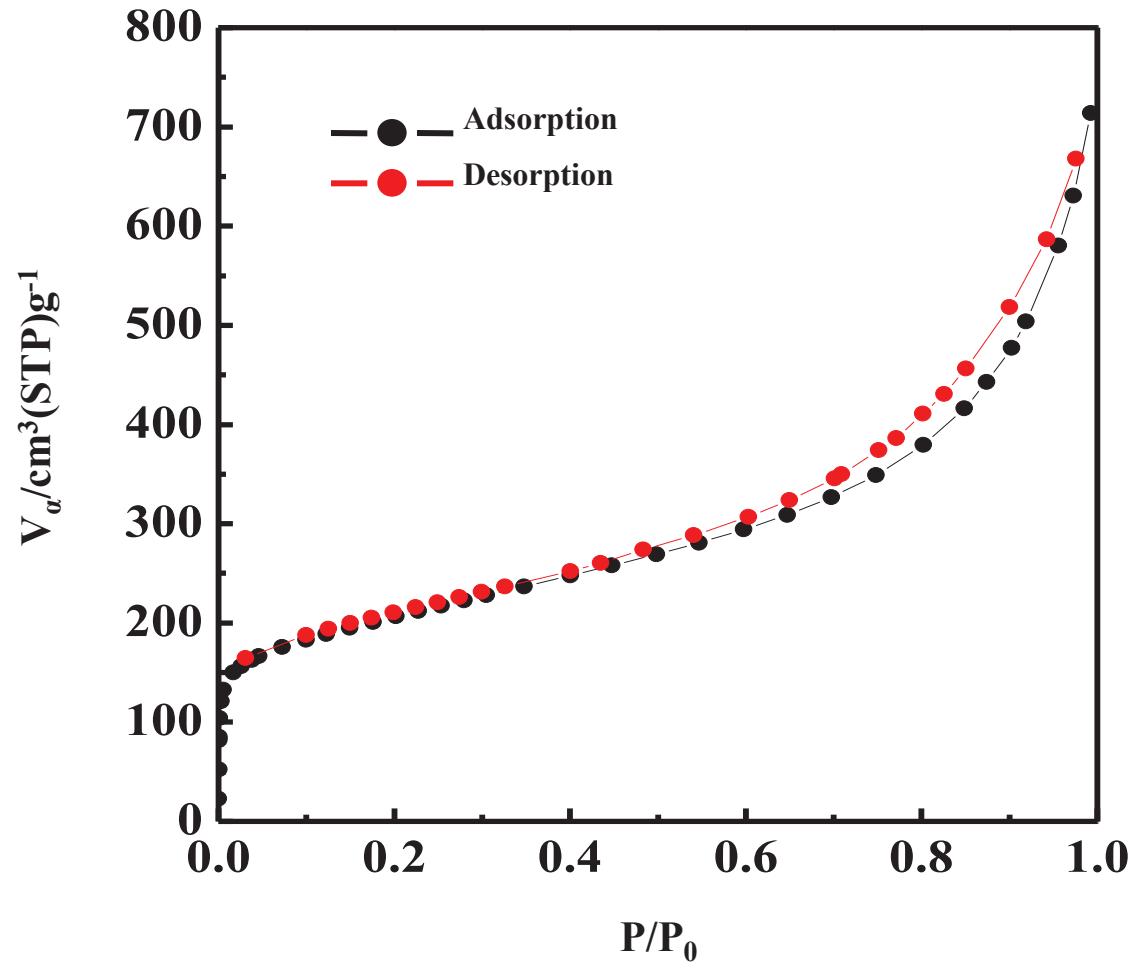

Supple 2.

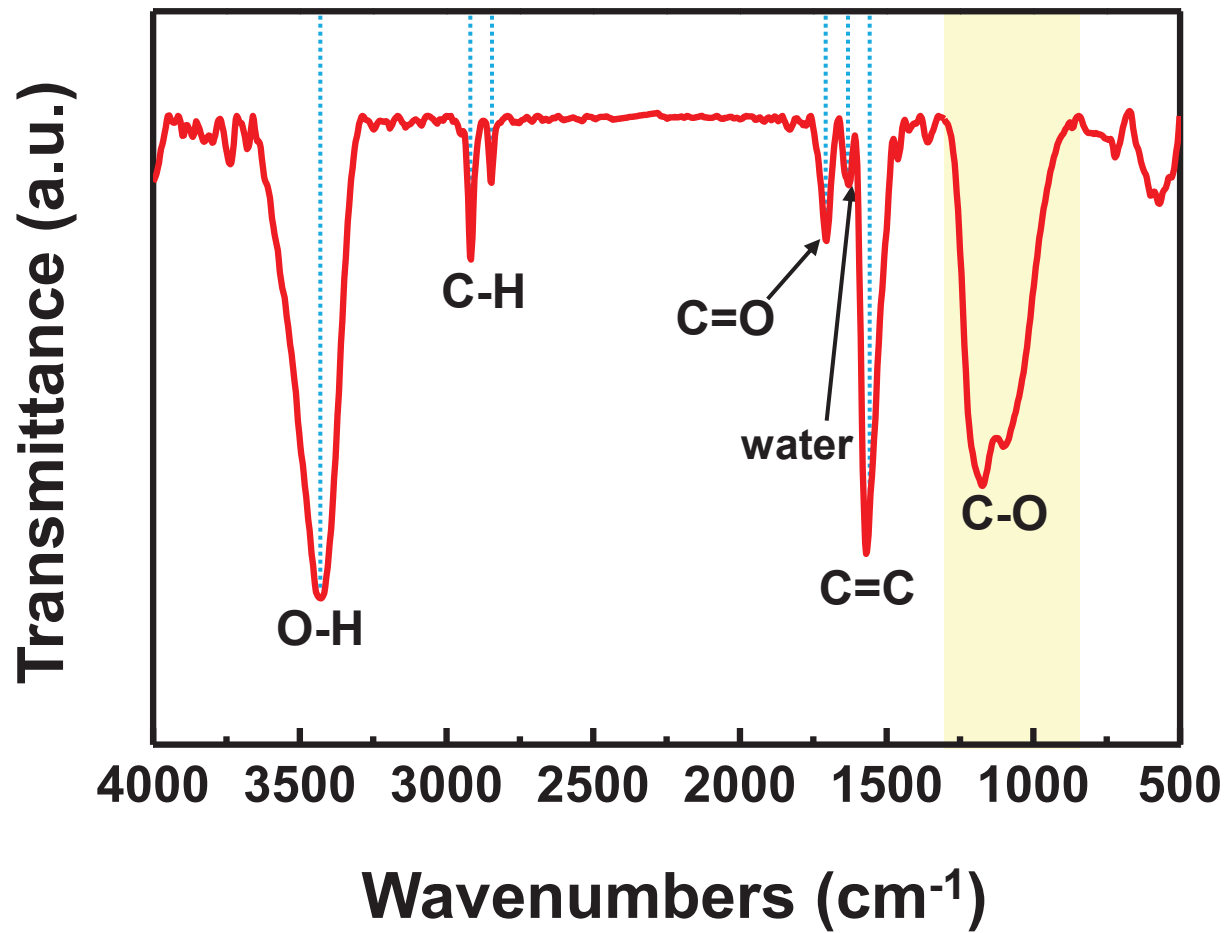

Supple 3.

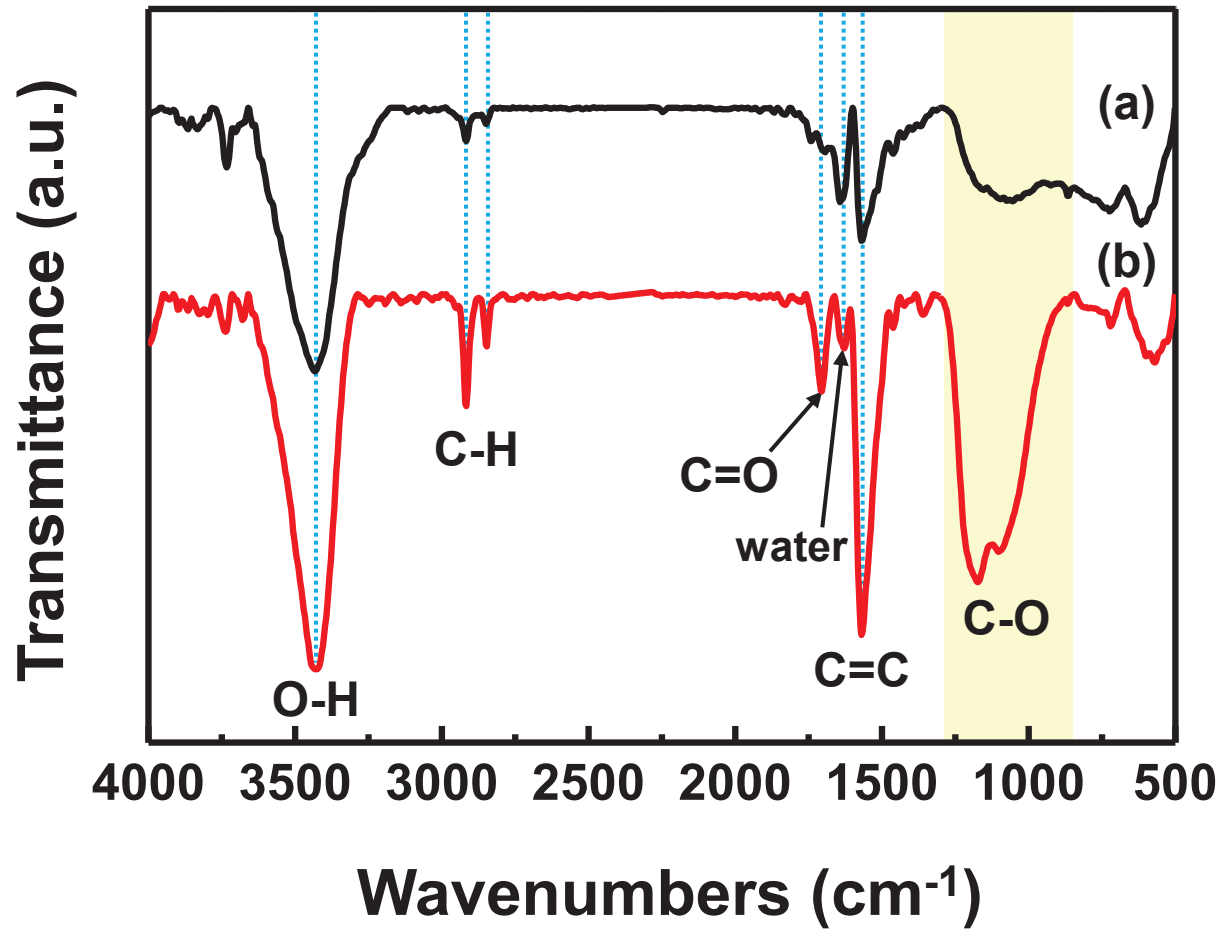

Supple 4.

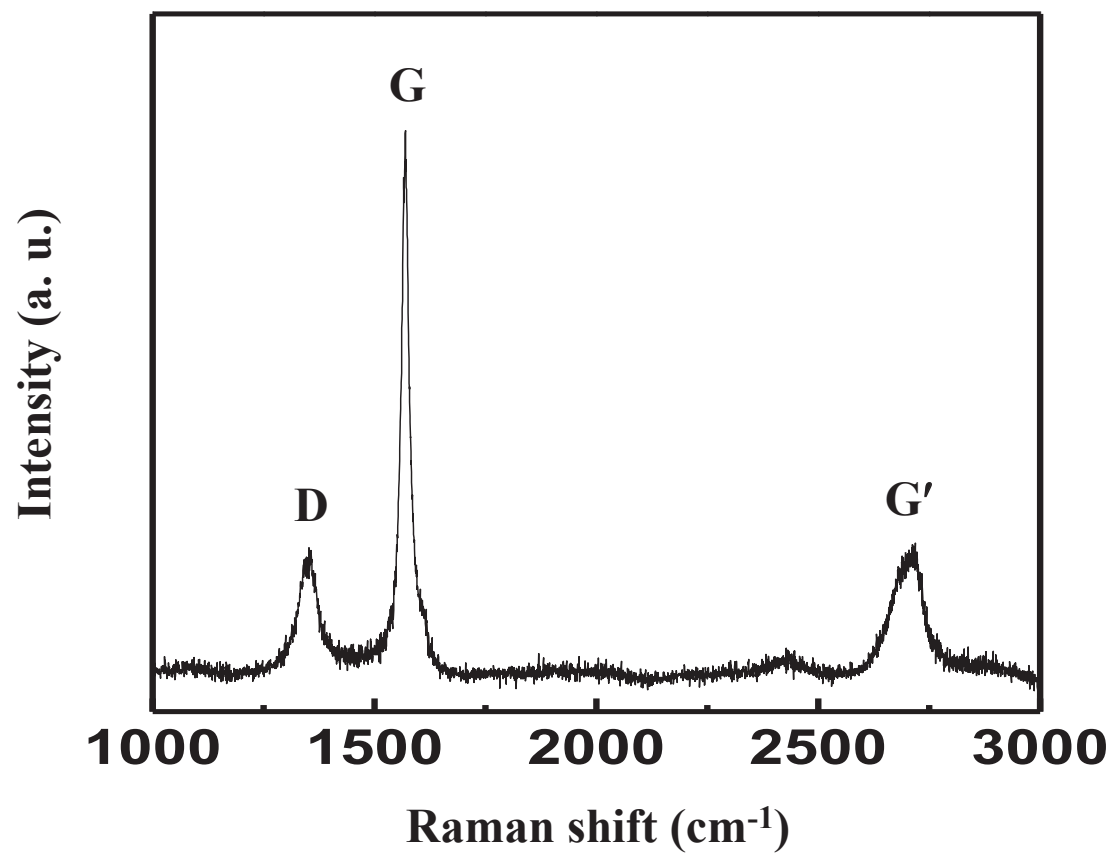

Supple 5.

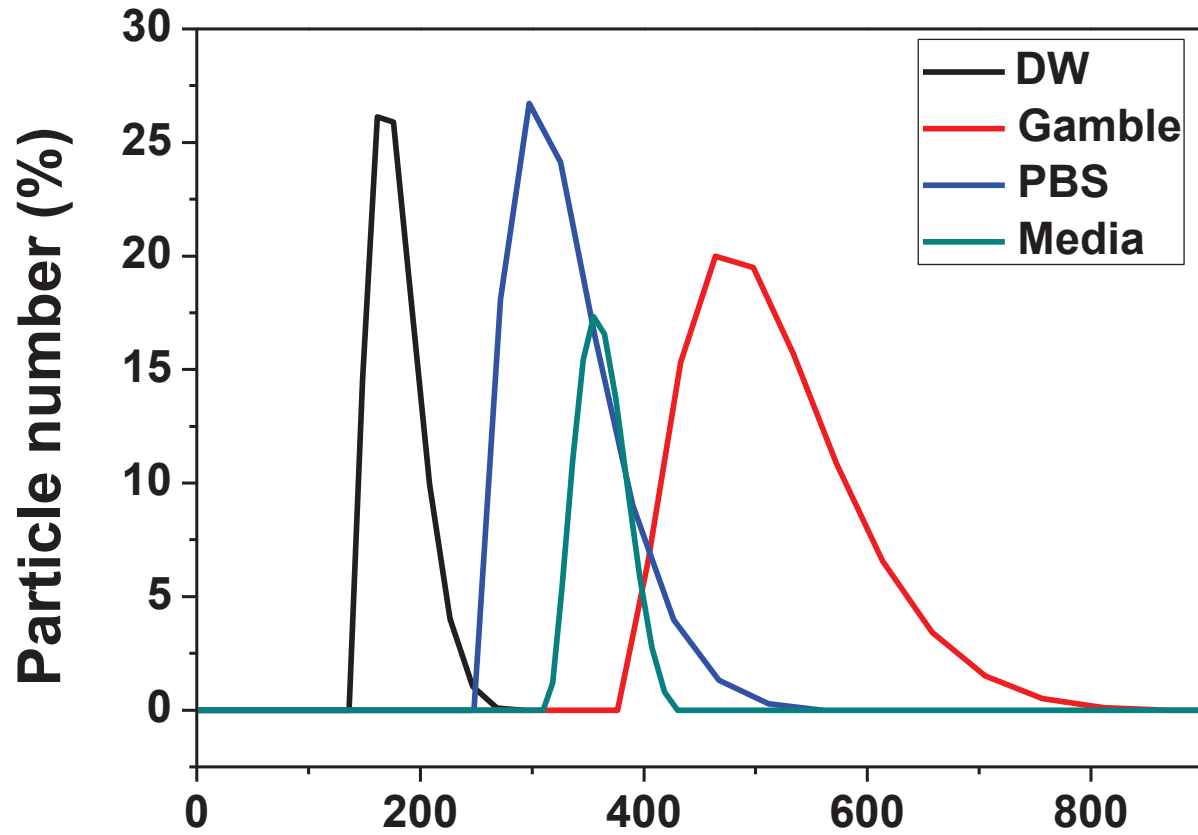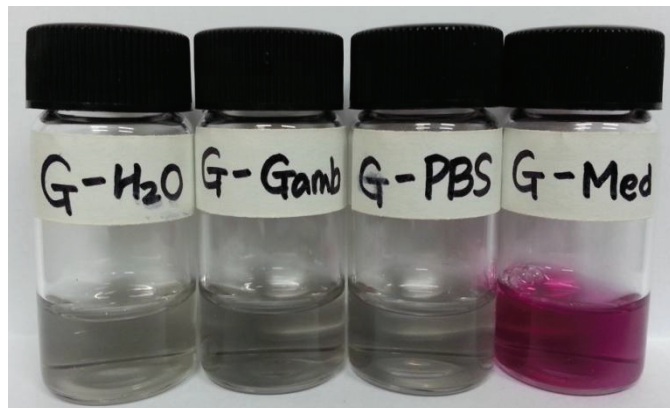

Supple 6.

2.5 mg/kg

5 mg/kg

Day 1

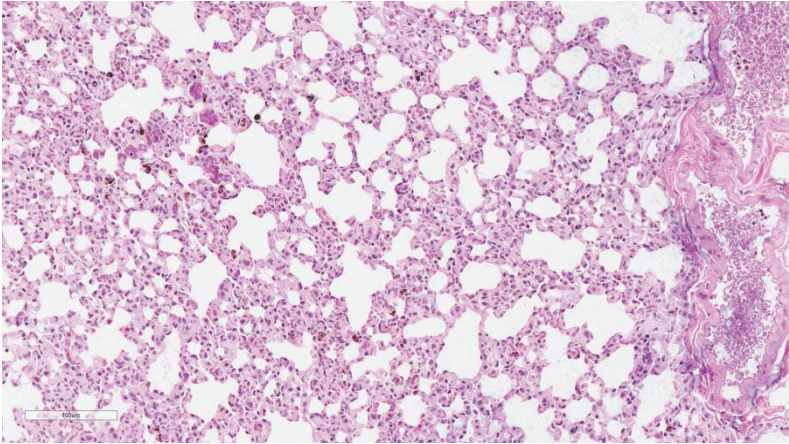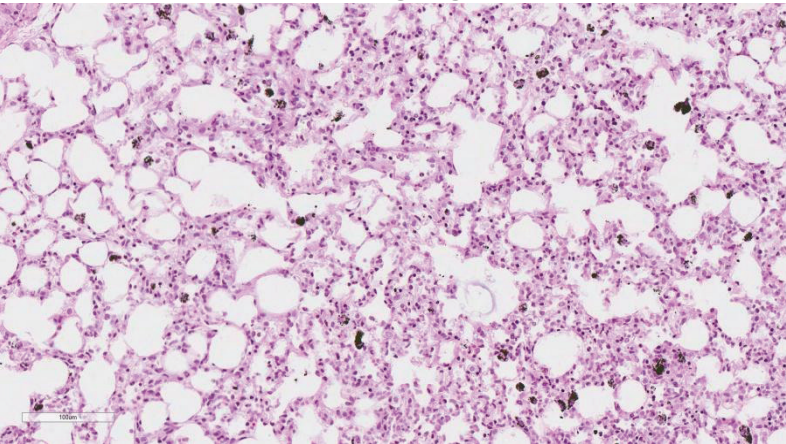

Day 7

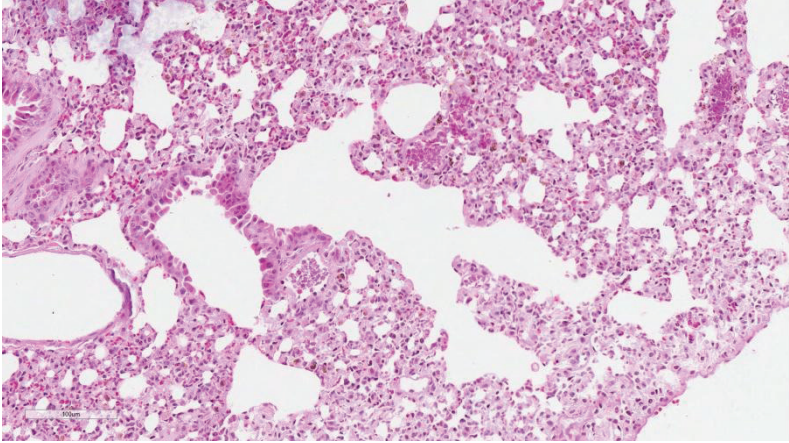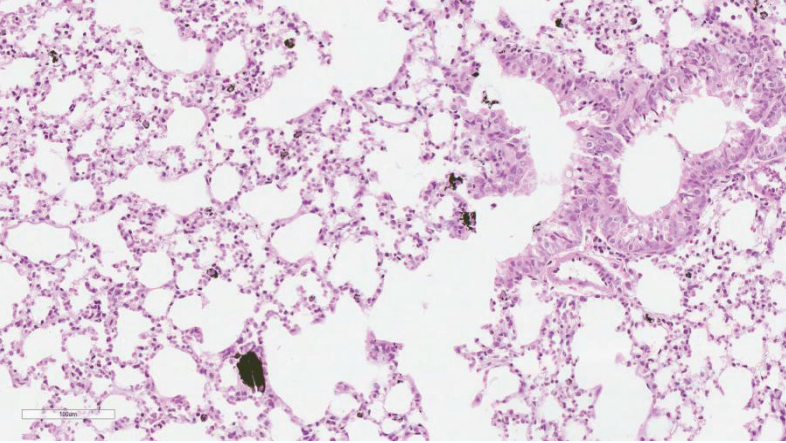

Day 14

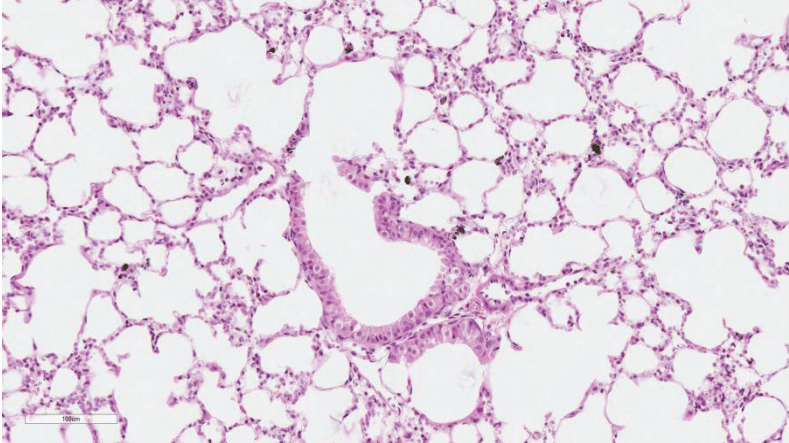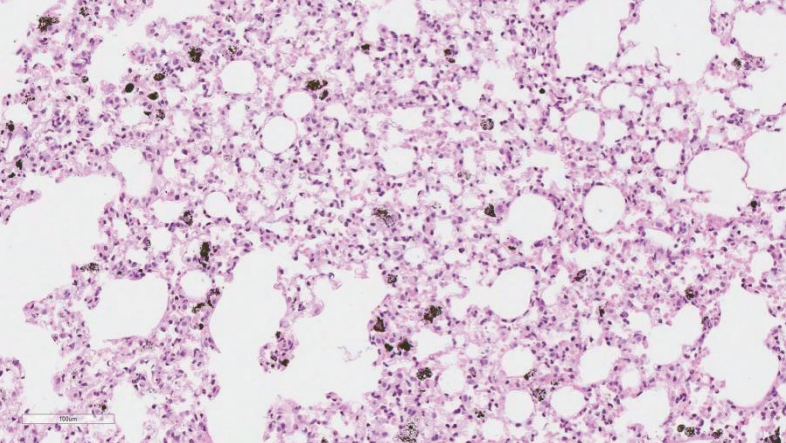

Supple7.

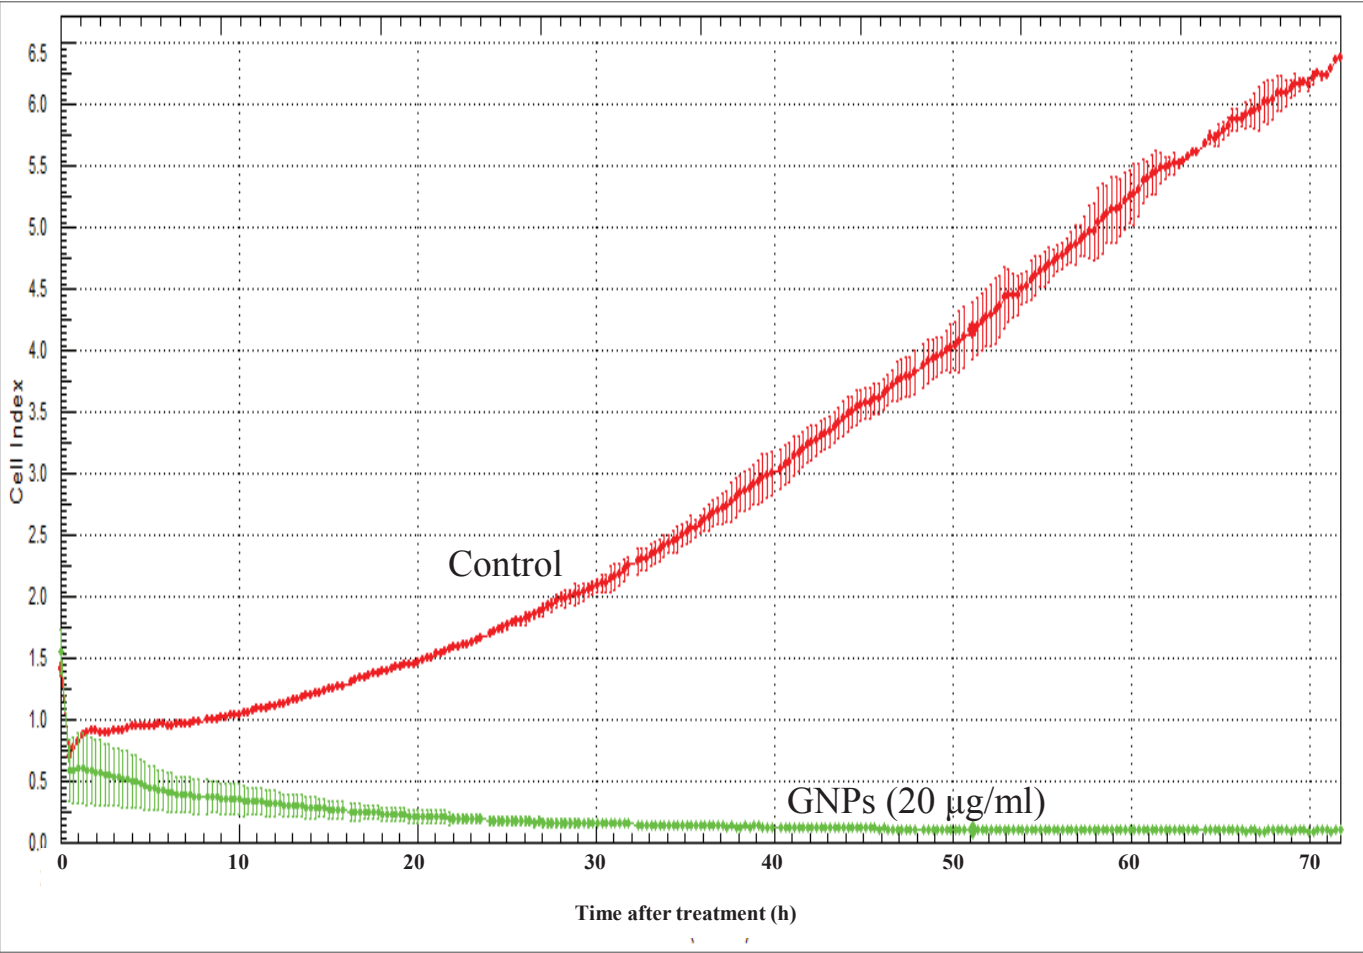

Supple 8.

ER

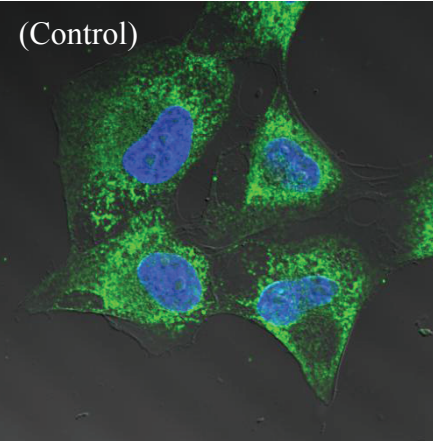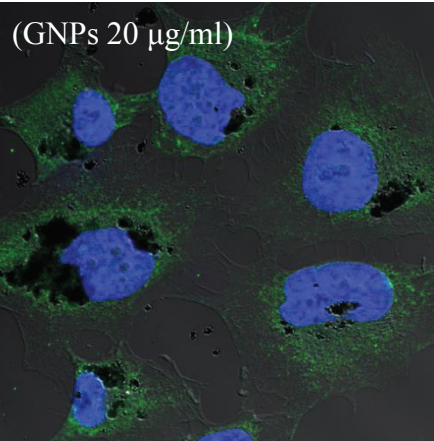

Golgi apparatus

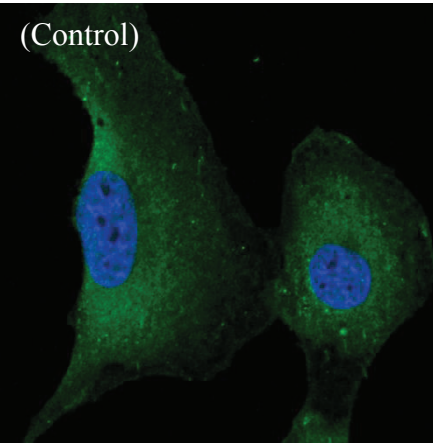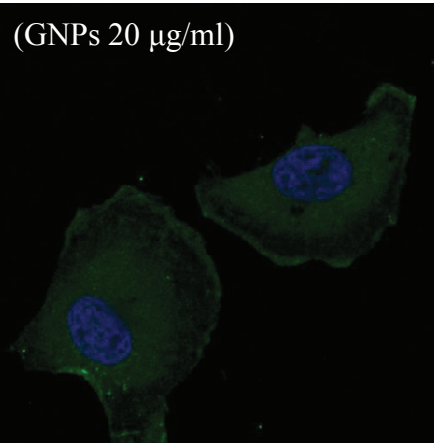

Lysosome

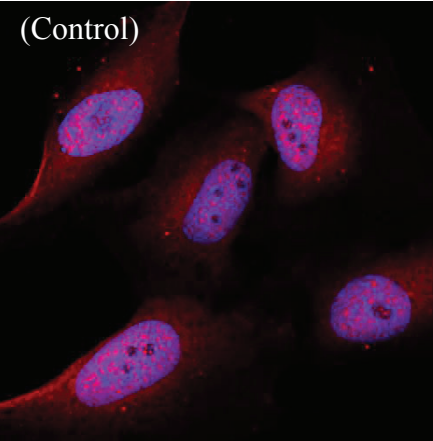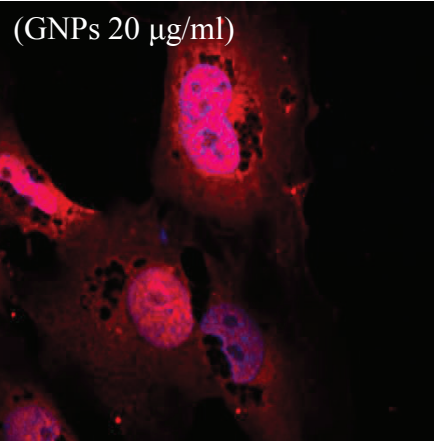



Supple 9.

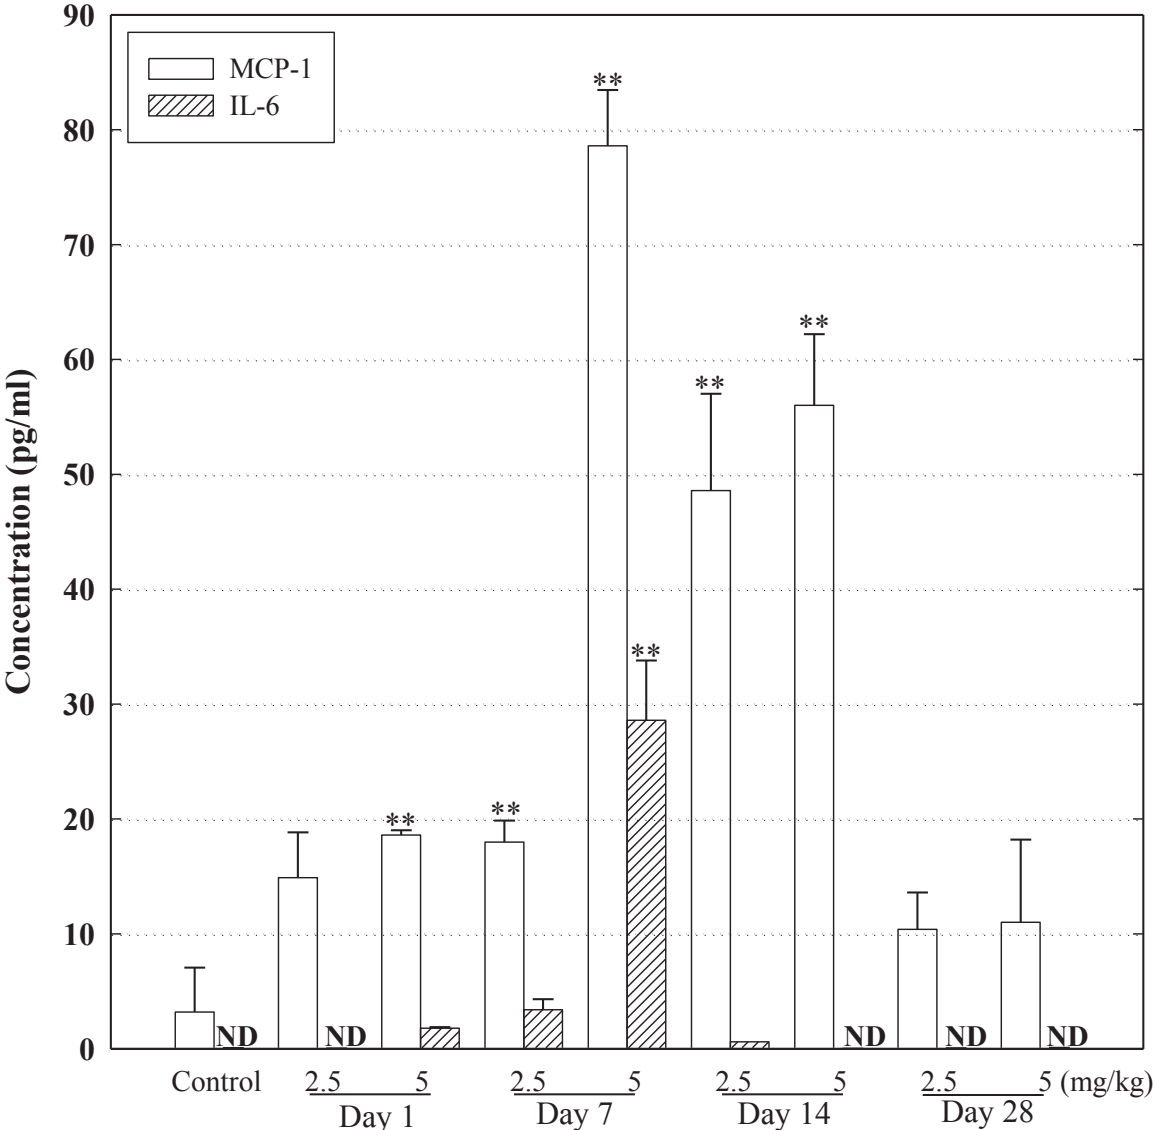

Supple 10.

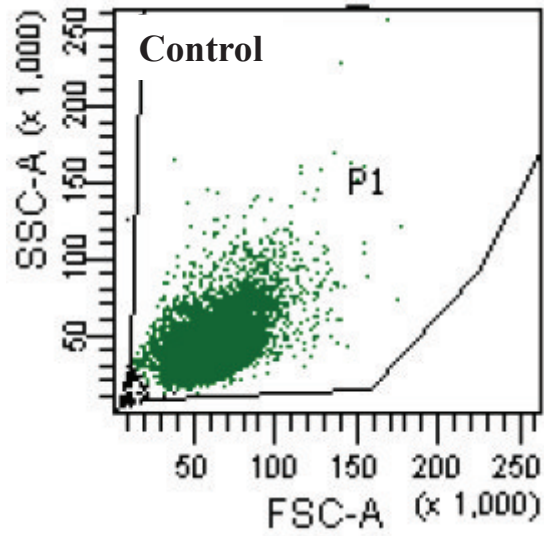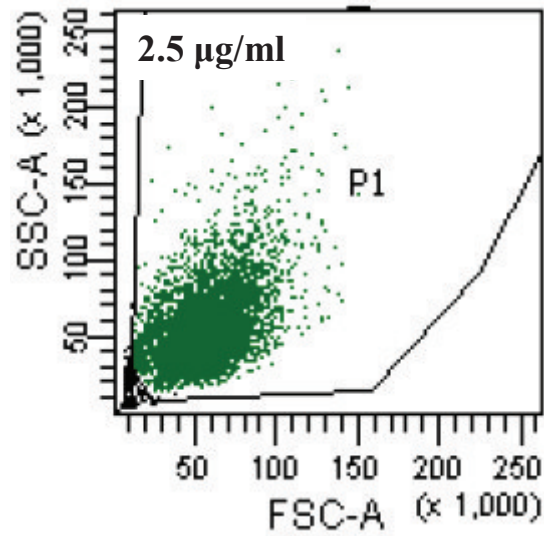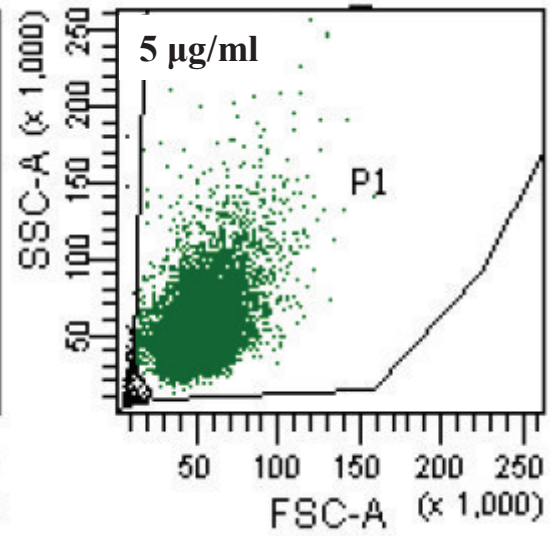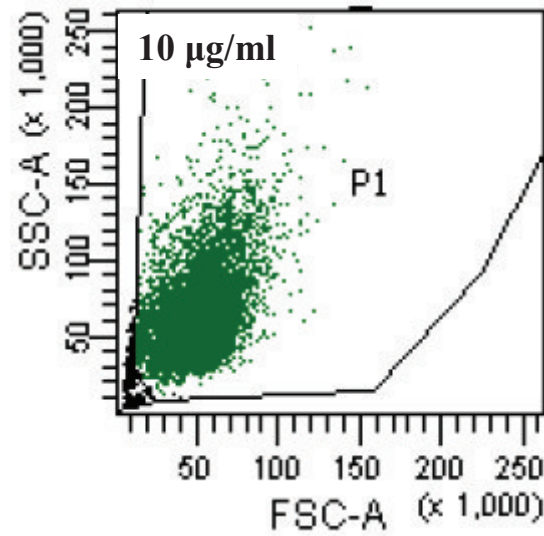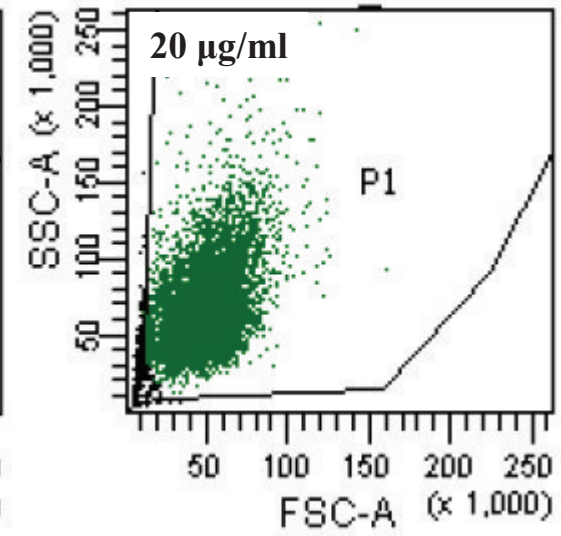

Supple 11.

hsp27

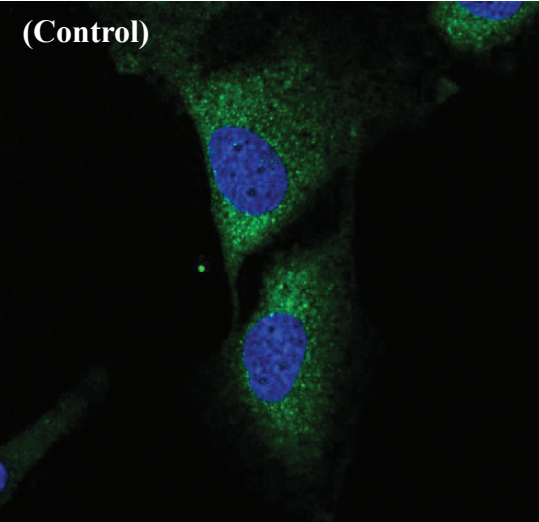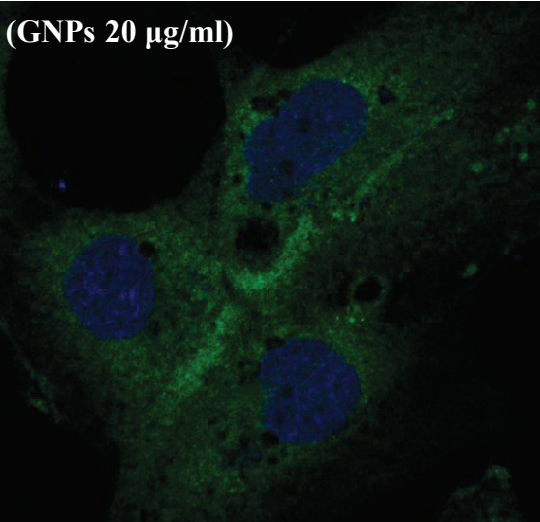

hsp70

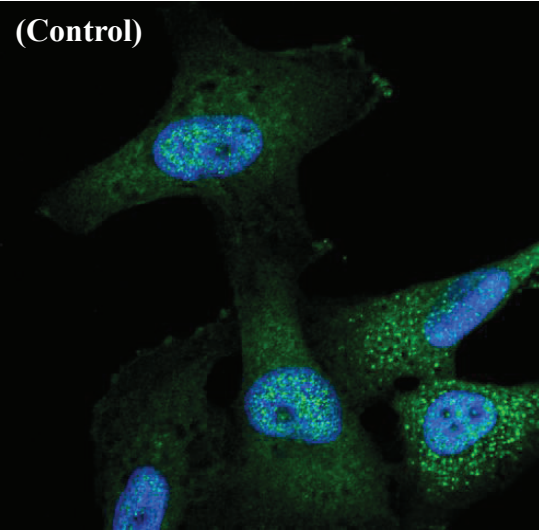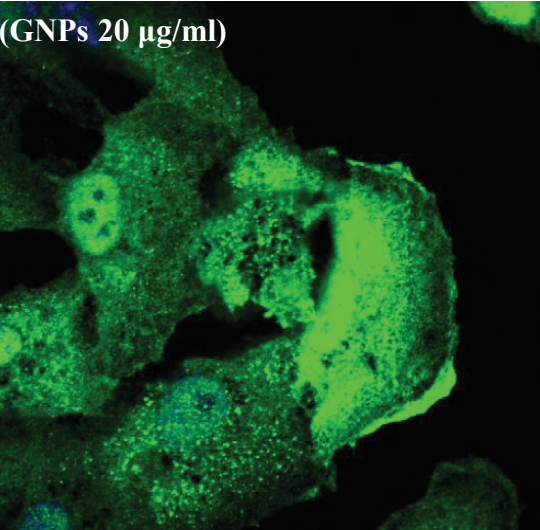

Supplement: 204_2014_1303_MOESM2_ESM.pdf [file 204_2014_1303_MOESM2_ESM.pdf]
